# Supplementary material
Source: PubMed Central journal article supplement (PMC4209172)
Supplement: NIHMS59053-supplement-5.pdf [file NIHMS59053-supplement-5.pdf]

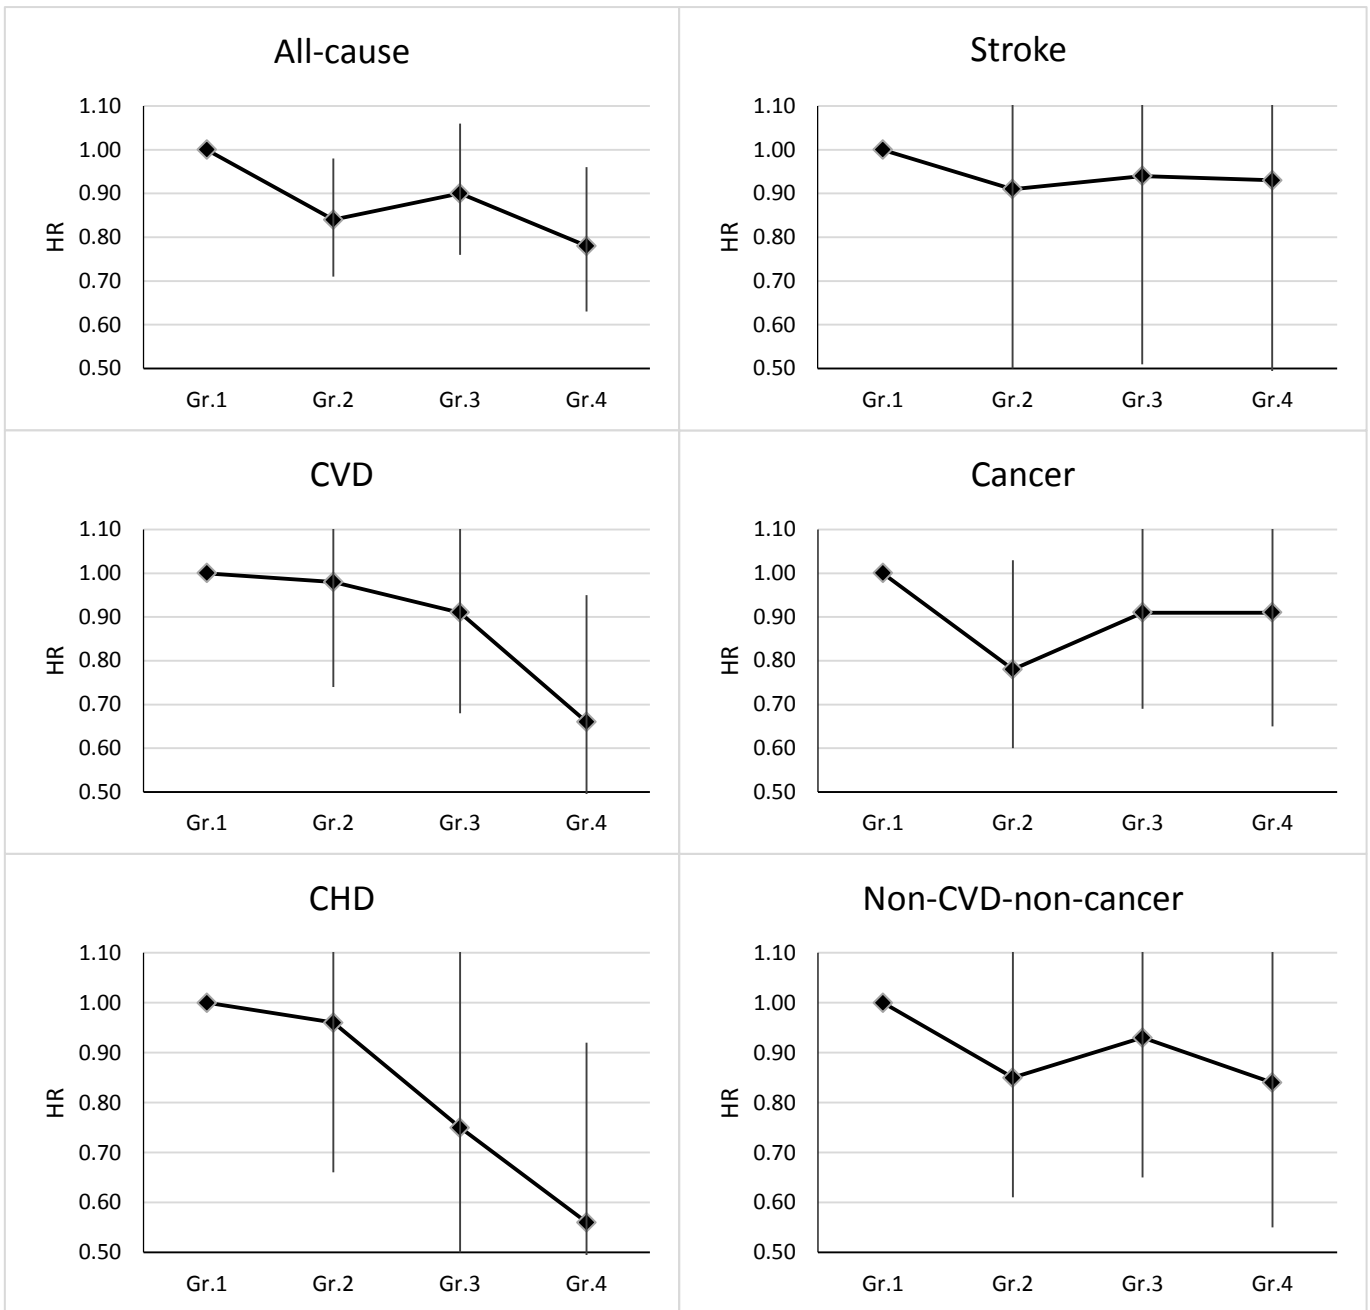

**Figure S1.** Multivariable adjusted hazard ratios (95% CIs) of all-cause and cause-specific mortalities across categorical HDI groups (Reference category: Gr. 1)

Groups are based on distance of HDI score from sample mean:

**Gr.1.:**  $\leq -1SD$

**Gr.2.:**  $> -1SD$  and  $\leq$  mean

**Gr.3.:**  $>$  mean and  $\leq 1 SD$

**Gr.4.:**  $> 1 SD$
